# Supplementary material
Source: MDPI journal article supplement (https://www.mdpi.com/1424-2818/6/4/665)
Supplement: s2 [file s2]

Archive with 3 entries (3 files):
- PCoA-procedures.rar
- diversity-06-00665-Supplementary.pdf
- npGeno.rar
